# Supplementary material
Source: publisher site journal article supplement (https://www.dovepress.com/article/496748)
Supplement: Supplementary file 1 [file get_supplementary_file.php]

## Supplementary Tables

### Table S1

**Table S1. All the antibodies and reagents utilized in this investigation**

| Antibodies and Reagents | Manufacturer, Country, Cat number, Lot number | Concentration |
| --- | --- | --- |
| Roswell Park Memorial Institute 1640 (RPMI-1640) | Gibco, USA, 31870082, 8123063 | - |
| Dulbecco’s modified Eagle’s medium (DMEM) | Gibco, USA, C11995500BT, 8122778 | - |
| Phosphate buffered saline (PBS) | Gibco, USA, 70011-044, 8123148 | - |
| Fetal bovine serum (FBS) | Gibco, USA, 10099-141, 2375386CP | - |
| Trypsin | Gibco, USA, 25300-054, 2509042 | - |
| Puromycin | Beyotime Biotechnology, China，ST551-10mg,050823230613 | - |
| 4% Paraformaldehyde | Biosharp, China, BL539A,23159313 |  |
| 4',6-diamidino-2-phenylindole  (DAPI) | Beyotime Biotechnology, China, C1002,  091620210520 | - |
| Immunastaining Permeabilization Buffer with TritonX-100 | Beyotime Biotechnology, China, P0096-100ml,042921211027 | - |
| Protease and phosphatase inhibitor cocktail for genneraluse,50X | Beyotime Biotechnology, China, P1045,051823230618 | - |
| bovine serum albumin (BSA) | Vazyme, USA, B2270DBA,027E2270DA | - |
| Crystal violet | Beyotime Biotechnology, China, C0121-100ml,121322230524 | - |
| Radioimmunoprecipitation assay buffer (RIPA buffer) | Beyotime Biotechnology,China，P0013B,052523230703 | - |
| Sodium dodecyl-sulfate polyacrylamide gel electrophoresis (SDS-PAGE) | EpiZyme, China, LK209,02652030 | - |
| Tricolor Prestained Protein Marker | EpiZyme, China, WJ103,027352000 | - |
| Lipofectamine 3000 | Invitrogen, USA, L3000-015, 2395298 | - |
| Opti-MEM | Gibco, USA, 31985-070, 2276923 | - |
| Bicinchoninic acid (BCA)  Assay Kit | Thermo Fisher Scientific, USA, 23227, XJ357433 | - |
| Tyramide signal amplification biotin system kit | UElady Biotechnology, China, Y6082L,210413L2-1 | - |
| Hematoxylin-Eosin staining Kit | Solarbio life sciences, China, G1120, 20220325 | - |
| POLR2C Polyclonal antibody | Proteintech, USA, 13428-1-AP, 00142052 | IHC 1:100  IF 1:100  WB 1:1000 |
| CDK2 Polyclonal antibody | Proteintech, USA, 10122-1-AP, 10038341 | IF 1:100 |
| Anti-CK Rabbit polyclonal Antibody | Cell Signaling Technology, USA, 12509, 3 | IF 1:100 |
| NSD1 Polyclonal Antibody | Thermo Fisher Scientific, USA, PA5-147548, WJ3394133 | IF 1:100 |
| RPB5 (POLR2E) Polyclonal antibody | Proteintech, USA, 15217-1-AP, 93570 | WB 1:1000 |
| POLR3K Polyclonal Antibody | Thermo Fisher Scientific, USA, PA5-103798, ZE4322048A | WB 1:1000 |
| POLR3H Polyclonal antibody | Proteintech, USA, 16423-1-AP, 58018 | WB 1:1000 |
| POLR2L Polyclonal antibody | Proteintech, USA, 15779-1-AP, 83762 | WB 1:1000 |
| YY1 Monoclonal antibody | Proteintech, USA, 66281-1-Ig, 10017826 | IHC 1:200  WB 1:1000 |
| Anti-β-actin Mouse polyclonal Antibody | Proteintech, USA, 20536-1-AP, 81115-1-RR | WB 1:5000 |
| Anti-CXCR4 antibody | Abcam, England, ab124824, g2195839-2 | IF 1:100  IHC 1:400 |
| Anti-CD44 antibody | Abcam, England,ab254530, g23242263-6 | IF 1:100  IHC 1:200 |
| CD74 Monoclonal antibody | Proteintech, USA, 66390-1-Ig, 10021293 | IF 1:200  IHC 1:200 |
| Anti-GAPDH Mouse polyclonal Antibody | Abbrab, China, AB300016, 4659180001 | WB 1:3000 |
| Anti-CD8 Mouse polyclonal Antibody | Cell Signaling Technology, USA, 55397, 3 | IHC 1:400 |
| MIF Polyclonal antibody | Proteintech, USA, 20415-1-AP, 104042 | IHC 1:200  IF 1:100 |
| CoraLite488-conjugated Goat Anti-Rabbit IgG(H+L) | Proteintech, USA, SA00013-2, 205001014 | IF 1:300 |
| CoraLite594-conjugated Goat Anti-Mouse IgG(H+L) | Proteintech, USA, SA00013-3, 20000154 | IF 1:300 |
| CoraLite647-conjugated Mouse Anti-Heavy Chain of Rabbit IgG | Proteintech, USA, SA00014-6, 20000129 | IF 1:300 |
| Highly Cross-Adsorbed Goat (Polyclonal) Anti-Mouse IgG(H+L) Antibody | LI-COR, USA, 926-68070, Q04695 | WB 1:5000 |
| Highly Cross-Adsorbed Goat (Polyclonal) Anti-Rabbit IgG(H+L) Antibody | LI-COR, USA, 926-68071, S11385 | WB 1:5000 |
| Human MIF ELISA Kit | Shanghai Enzyme Linked Biology, mlsw_E1264, 06/2024 | - |
| Alexa Fluor® 488 anti-human CD3 | BioLegend, USA, clone: OKT3, 317310, B369206 | 2ul/1×106 Cell |
| EasySep™ Human CD3 Positive Selection Kit | STEMCELL Technologies, Canada,  17851,1000142711 | - |

### Table S2

**Table S2 Plasmid information**

| Item | Sequence (5′-3′) |
| --- | --- |
| si-RNA plasmid | |
| si-YY1-3 | CGAGGAUCAGAUUCUCAUC |
| si-NC | UUCUCCGAACGUGUCACGU |
| Overexpression plasmid | |
| POLR2C forward | ATGTTCGTTCCCTGCGGGGAGTCG |
| POLR2C reverse | TCAGAAAAGTGCAGGGGGAAGACCAC |

## Supplementary Figures

### Figure S1


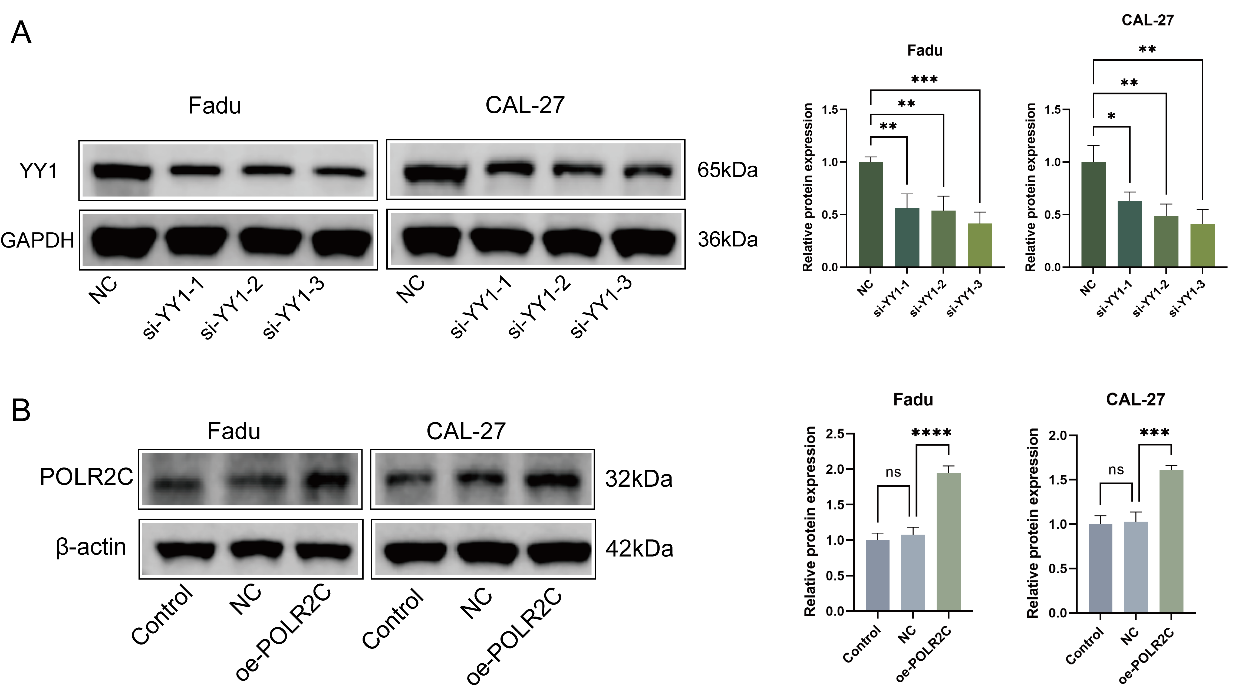


Figure S1. Transfection efficiency was verified by Western blot.

(A) Verification of siRNA YY1 knockdown efficiency.

(B) The transfection efficiency of POLR2C overexpression plasmid was validated via western blot analysis.

Data are shown as mean ± SEM, **** P <0.0001, *** P <0.001, ** P < 0.01, *P < 0.05 vs. NC group (ANOVA). All assays were replicated thrice, independently.

### Figure S2


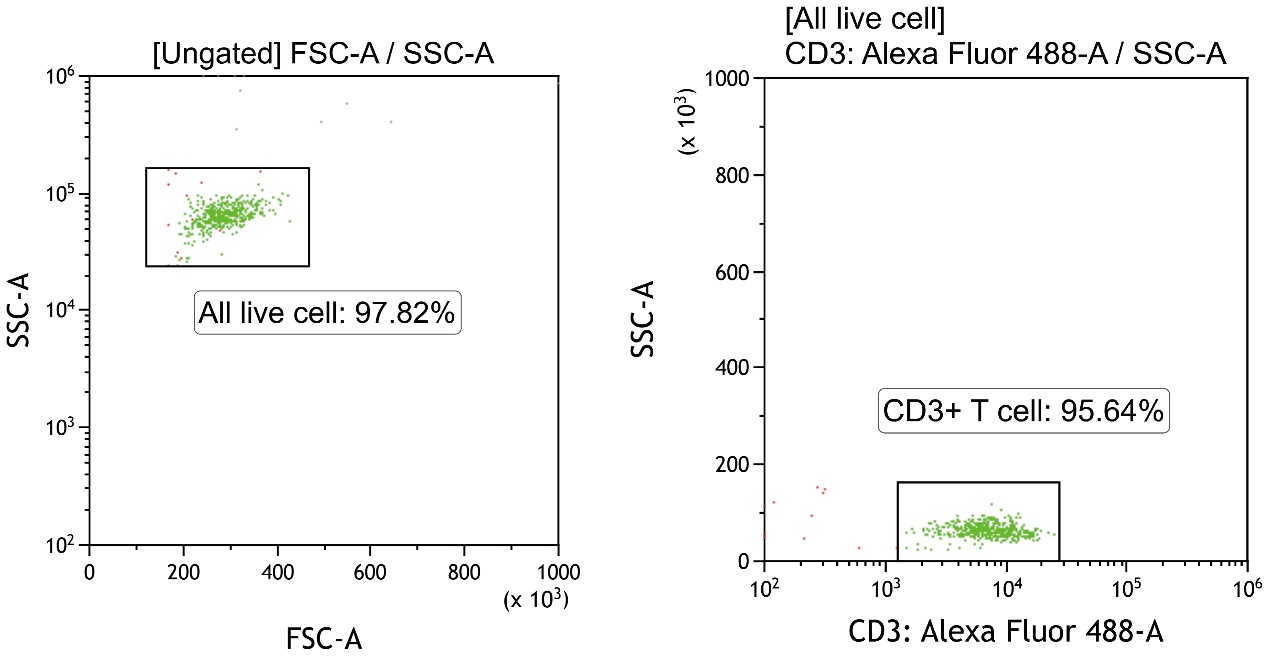


Figure S2. CD3+ T cells were isolated using CD3 magnetic beads and were at least 95% pure.

### Figure S3


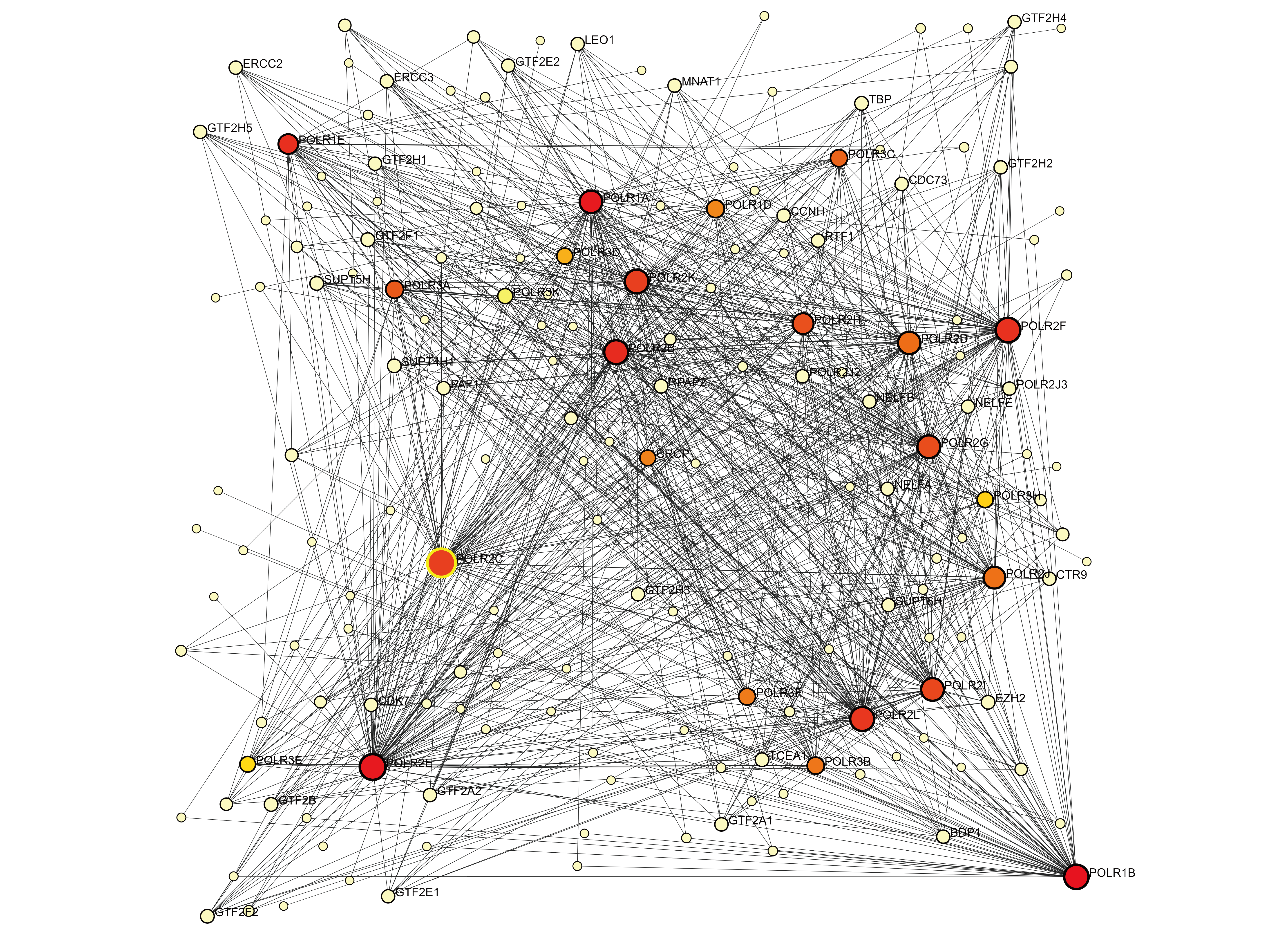


Figure S3. The POLRs and related molecules regulatory network constructed by the NetworkAnalyst.

### Figure S4


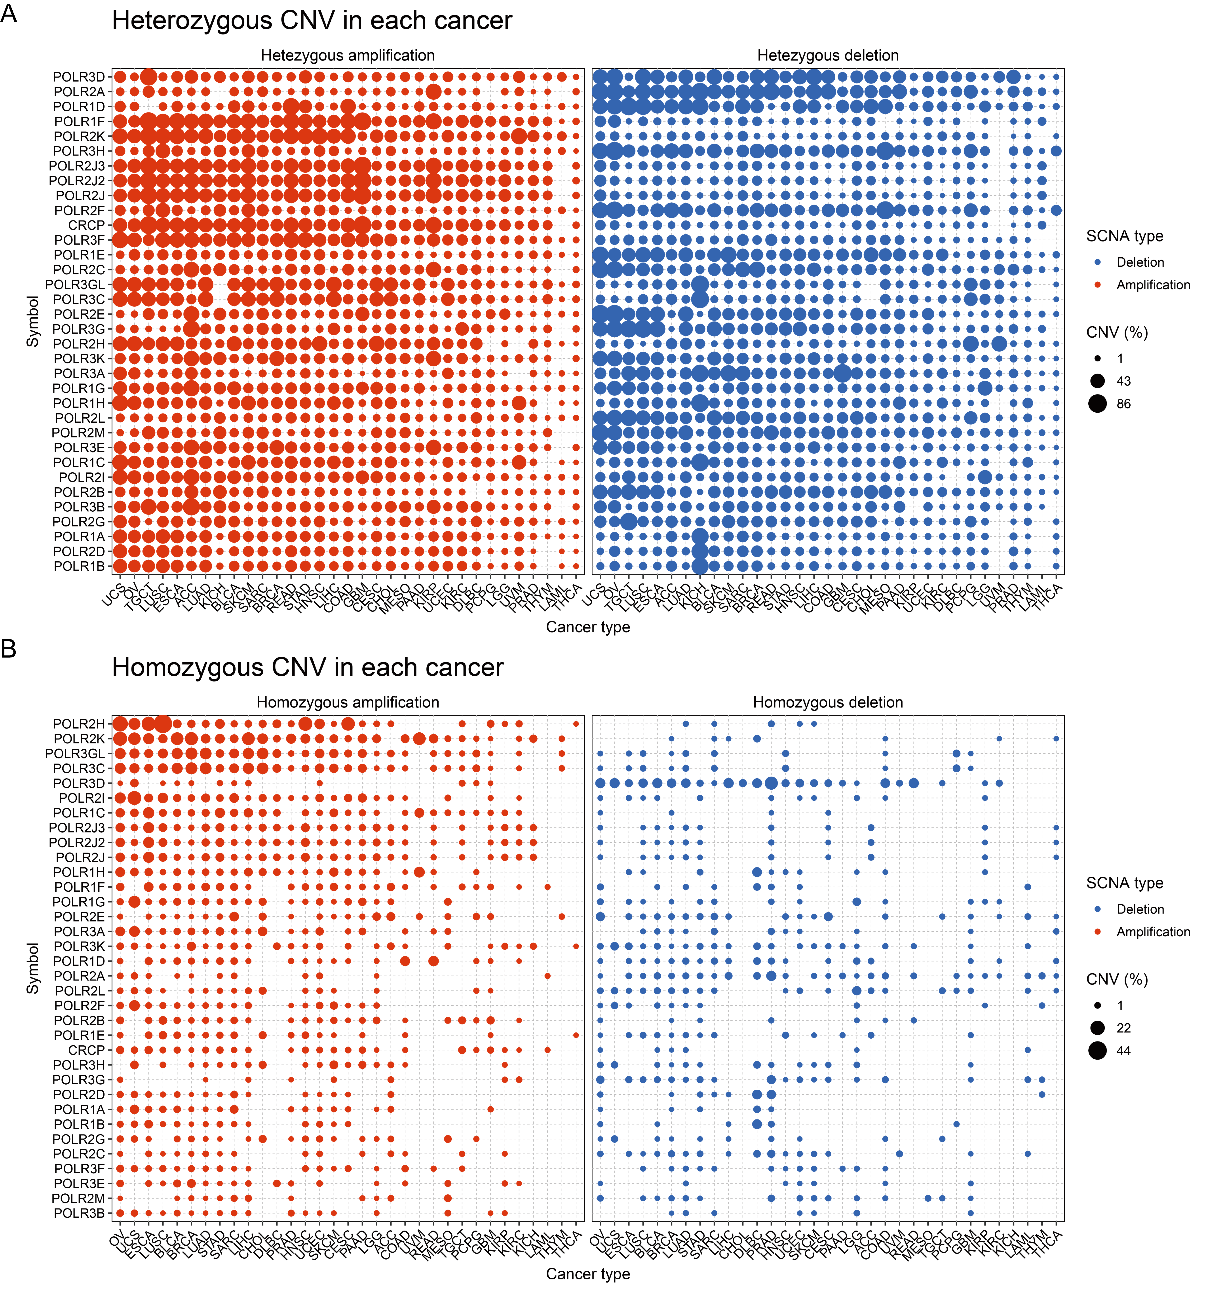


Figure S4. Copy number variation (CNV) analysis of POLR genes across various cancer types.

(A) The amplification and deletion percentage of heterozygous CNV for each POLR gene in each cancer type. The left panel displays heterozygous amplifications (red dots), and the right panel shows heterozygous deletions (blue dots). The size of the dots corresponds to the percentage of CNV, with larger dots indicating higher frequency.

(B) The amplification and deletion percentage of homozygous CNV for each POLR gene in each cancer type. The left panel displays homozygous amplifications (red dots), and the right panel shows homozygous deletions (blue dots). The size of the dots corresponds to the percentage of CNV, with larger dots indicating higher frequency.

### Figure S5


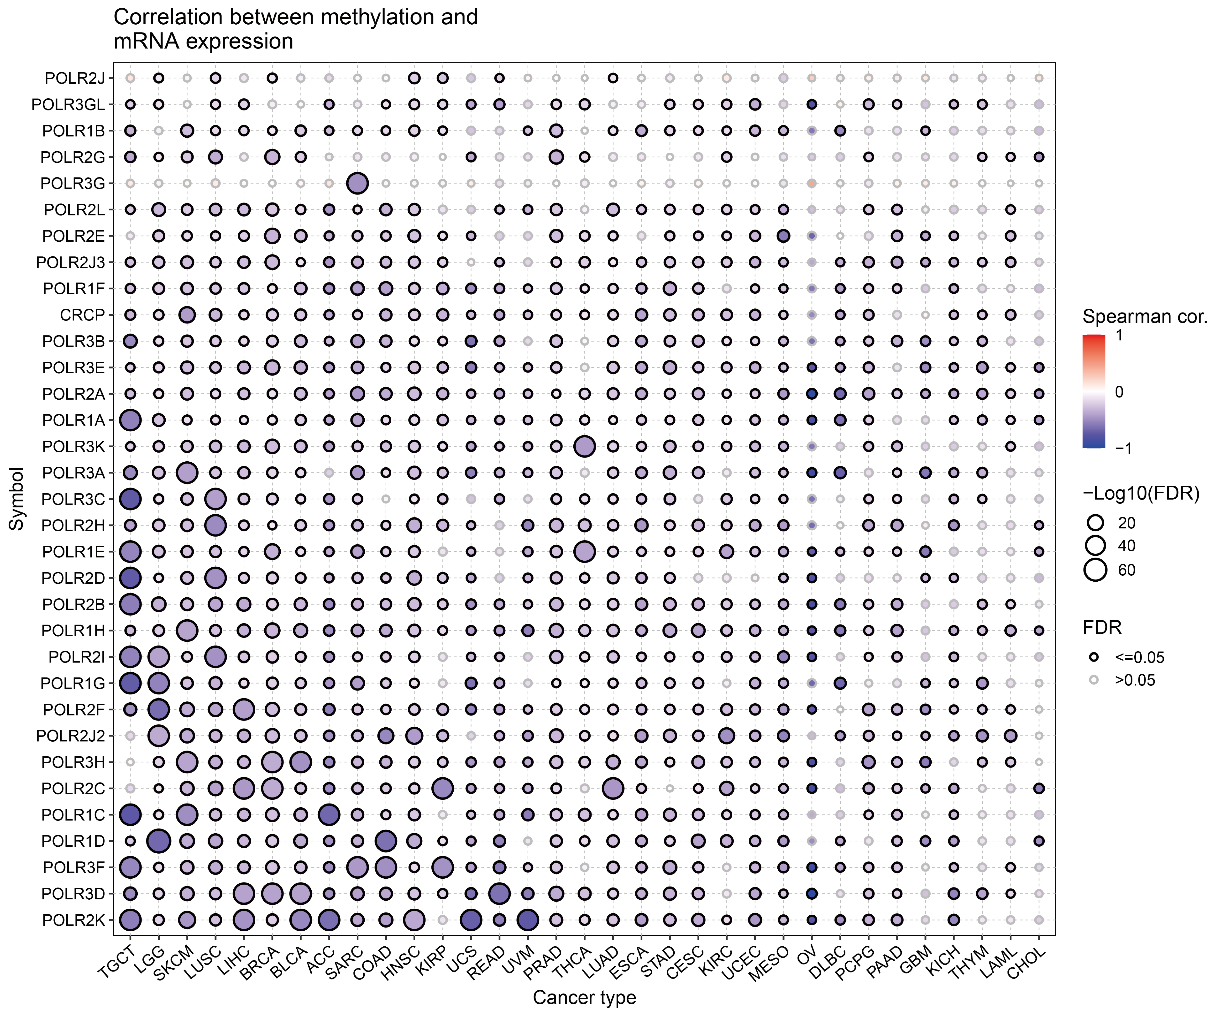


Figure S5. The bubble chart shows the correlation between methylation of the 34 POLR-related molecules and mRNA expression. Red shows a positive correlation and blue shows a negative correlation. The darker color indicates a larger correlation index. Bubble size indicates the FDR.

### Figure S6


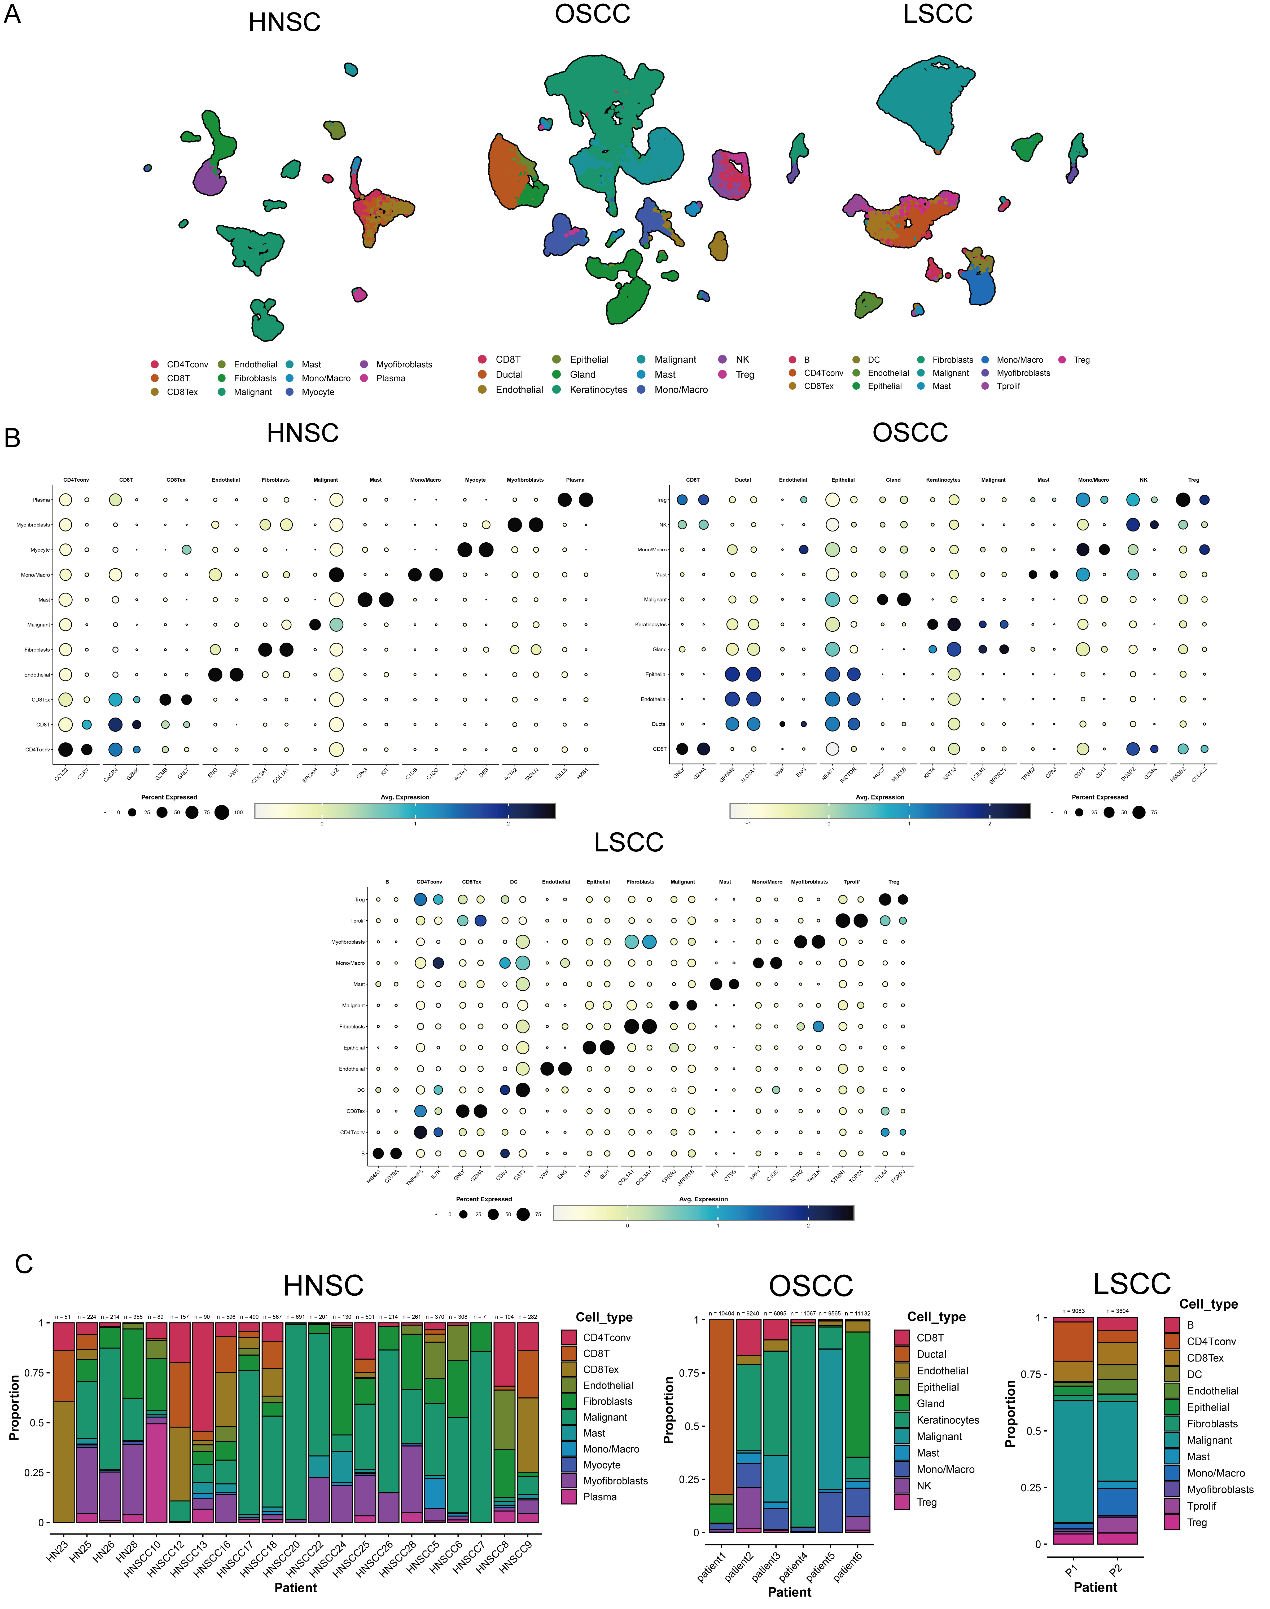


Figure S6. POLR expression level ascend in malignant cells.

(A) Uniform manifold approximation and projection (UMAP) plots showing the distribution of annotated cell types identified in single-cell RNA-seq (scRNA-seq) datasets: GSE103322 (HNSC), GSE172577 (OSCC), and GSE150321 (LSCC). Cell types include malignant cells, immune cells (e.g., CD8+ T cells, CD4+ T cells, Tregs), stromal cells (e.g., fibroblasts, endothelial cells), and others.

(B) Bubble plots displaying the expression levels and percentage of marker genes specific to each cell type in the scRNA-seq datasets GSE103322 (HNSC), GSE172577 (OSCC), and GSE150321 (LSCC). The size of the bubbles represents the percentage of cells expressing the marker, while the color intensity reflects the average expression level.

(C) Bar plots depicting the proportion of each cell type across samples in the scRNA-seq datasets GSE103322 (HNSC), GSE172577 (OSCC), and GSE150321 (LSCC). Malignant cells constitute a significant proportion of the cellular composition in all datasets.

### Figure S7


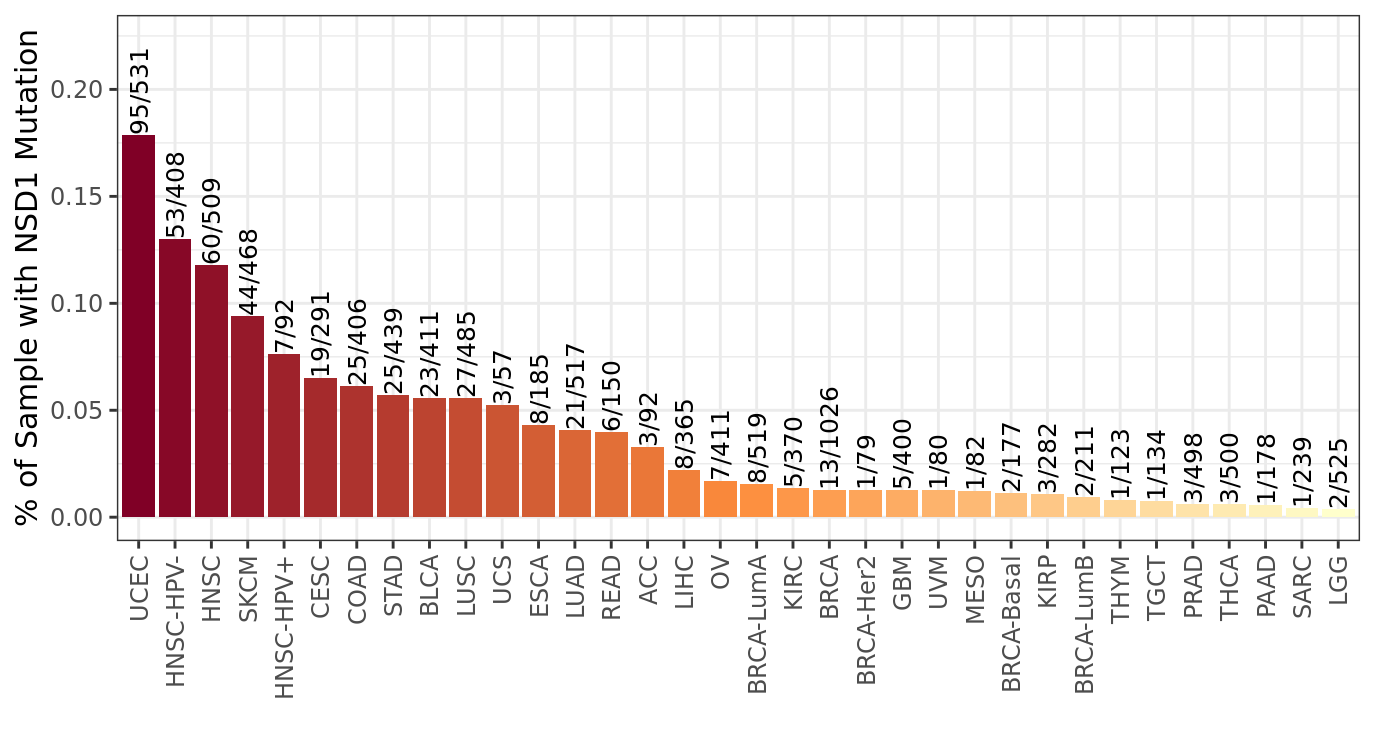


Figure S7. Bar graph generated by TIMER demonstrating the mutation frequency of *NSD1* in pan-cancer.

### Figure S8


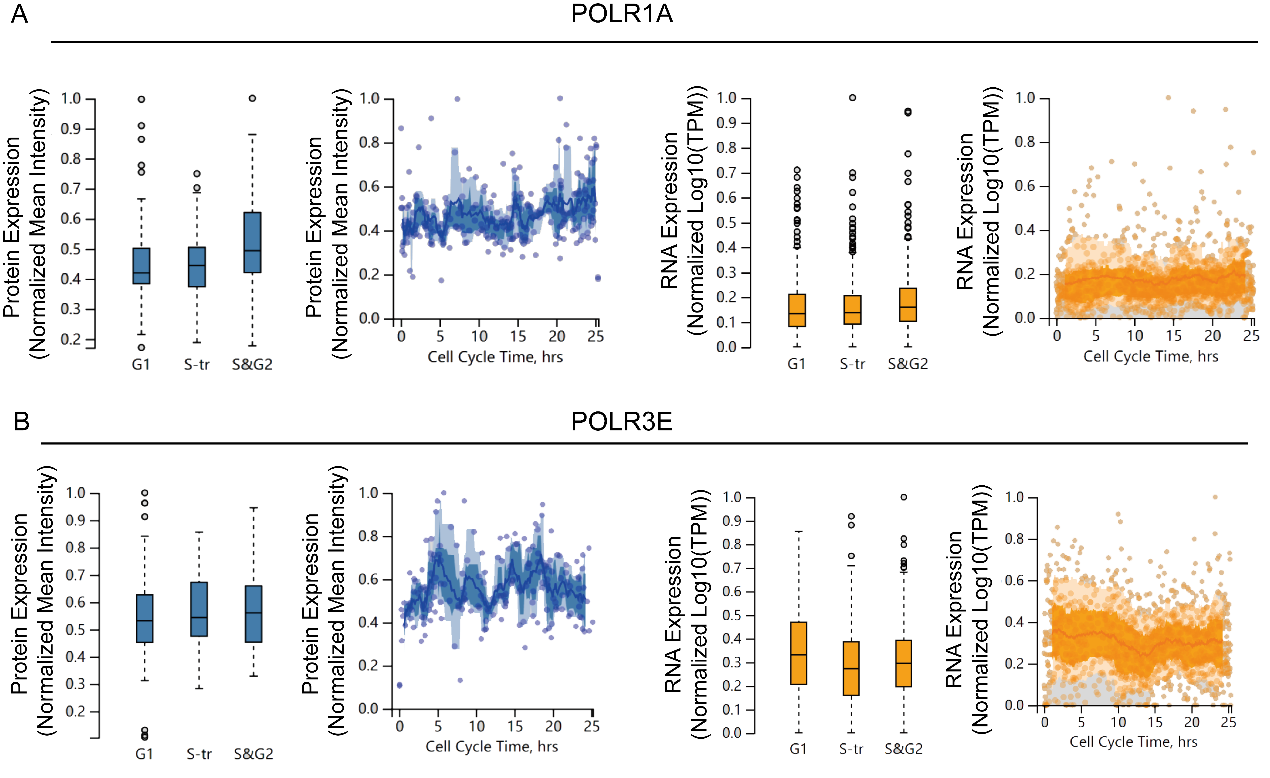


Figure S8. Cell-cycle analysis of POLRs based on HPA database.

(A-B) Relative expression levels of POLR1A (A) and POLR3E (B) at different cell division phases. Left: protein level (blue); right: transcriptome level (orange). Data are from HPA database, only POLR1A- and POLR3E-related information can be obtained.

### Figure S9


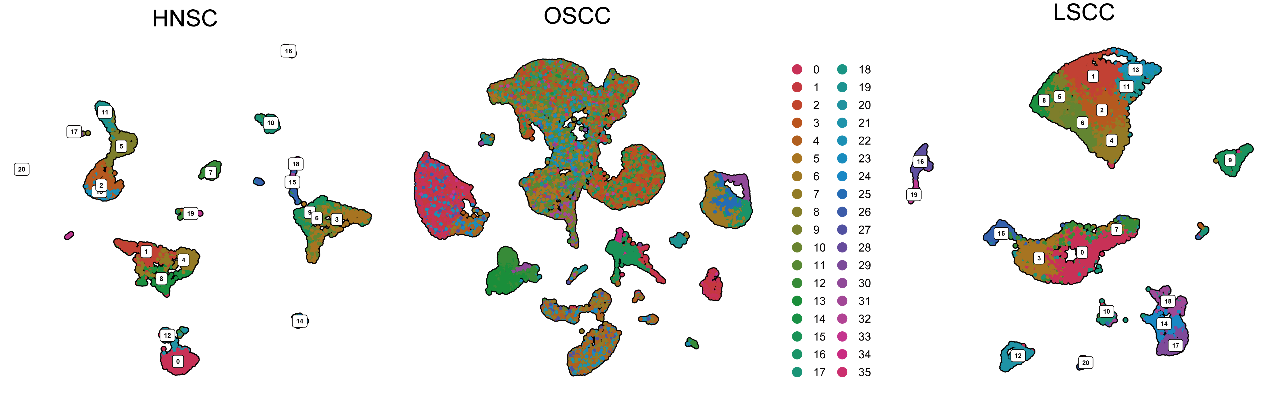


Figure S9. UMAP dimensionality reduction analysis.

UMAP plots showing the distribution of cell clusters identified in single-cell RNA-seq datasets from head and neck squamous cell carcinoma (HNSC), oral squamous cell carcinoma (OSCC), and laryngeal squamous cell carcinoma (LSCC) based on data provided by TISCH. A total of 20, 35, and 19 cell clusters were identified in HNSC, OSCC, and LSCC datasets, respectively. Each cluster is color-coded, and cluster identities are annotated with numbers, representing distinct transcriptional profiles and cellular states.

### Figure S10


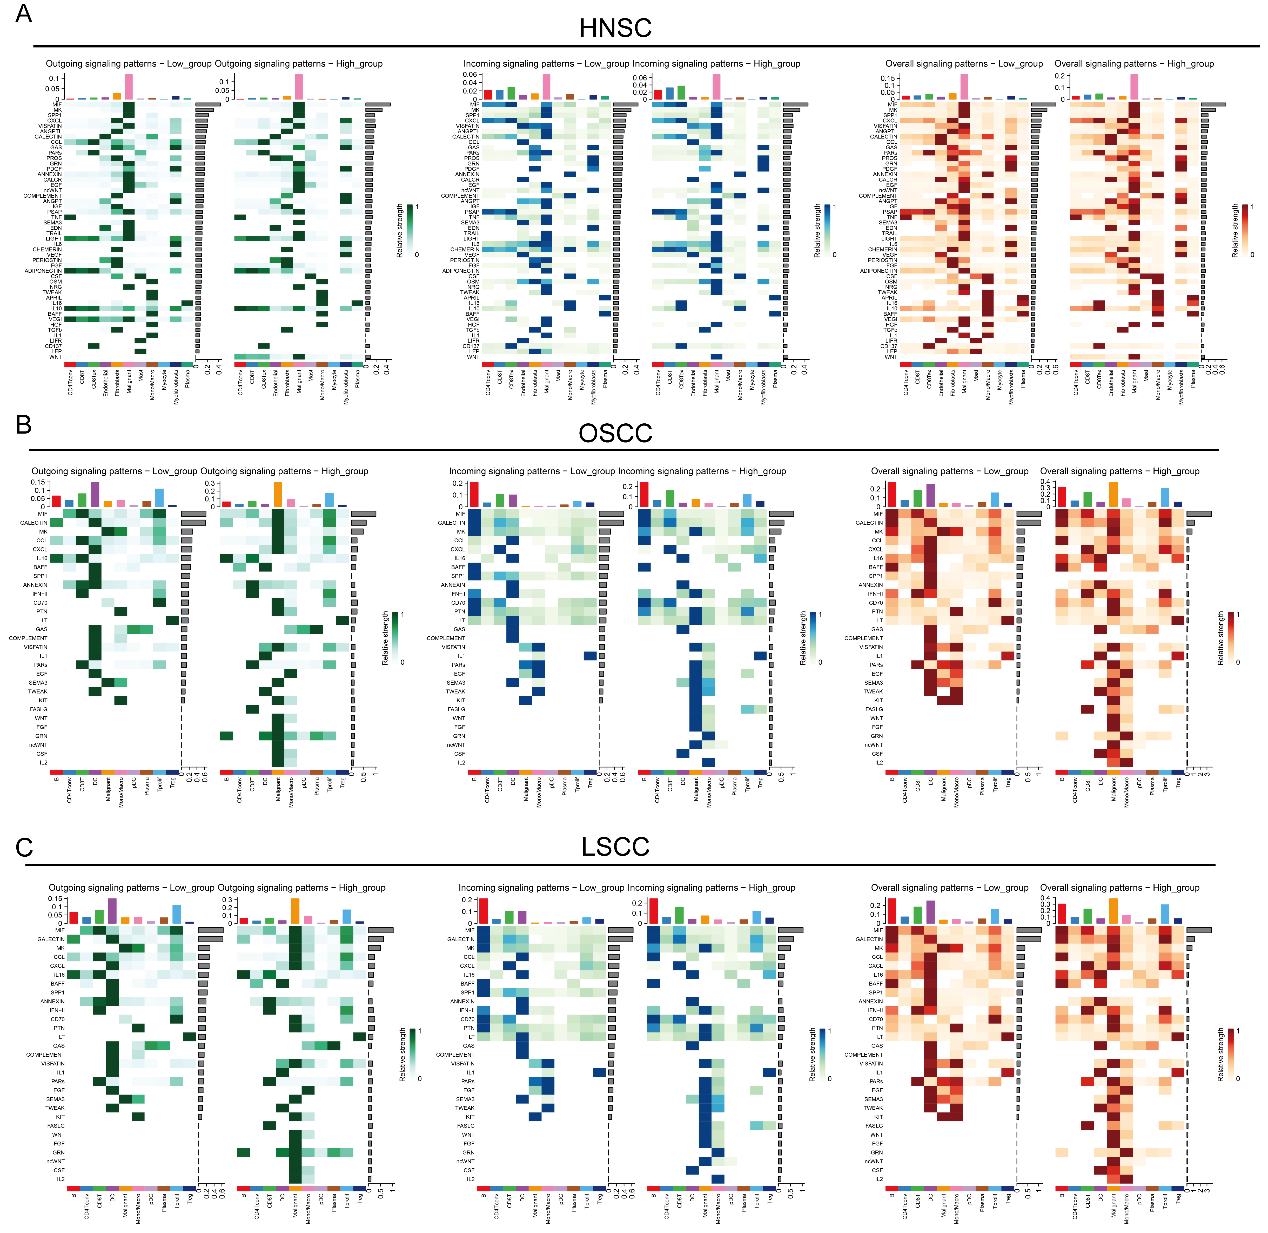


Figure S10. Cellchat analysis.

(A-C) Heatmaps showing the differences in input (left), output (middle), and total (right) signaling patterns between POLR-high and POLR-low groups in HNSC (A), OSCC (B), and LSCC (C).
